# Supplementary figures and images for: Cross-sectional Analysis of Infant Diet, Outcomes, Consumer Behavior and Parental Perspectives to Optimize Infant Feeding in Response to the 2022 U.S. Infant Formula Shortage
Source: Preprints.org preprint supplement (doi:10.20944/preprints202401.2060.v1), 2024-01-30

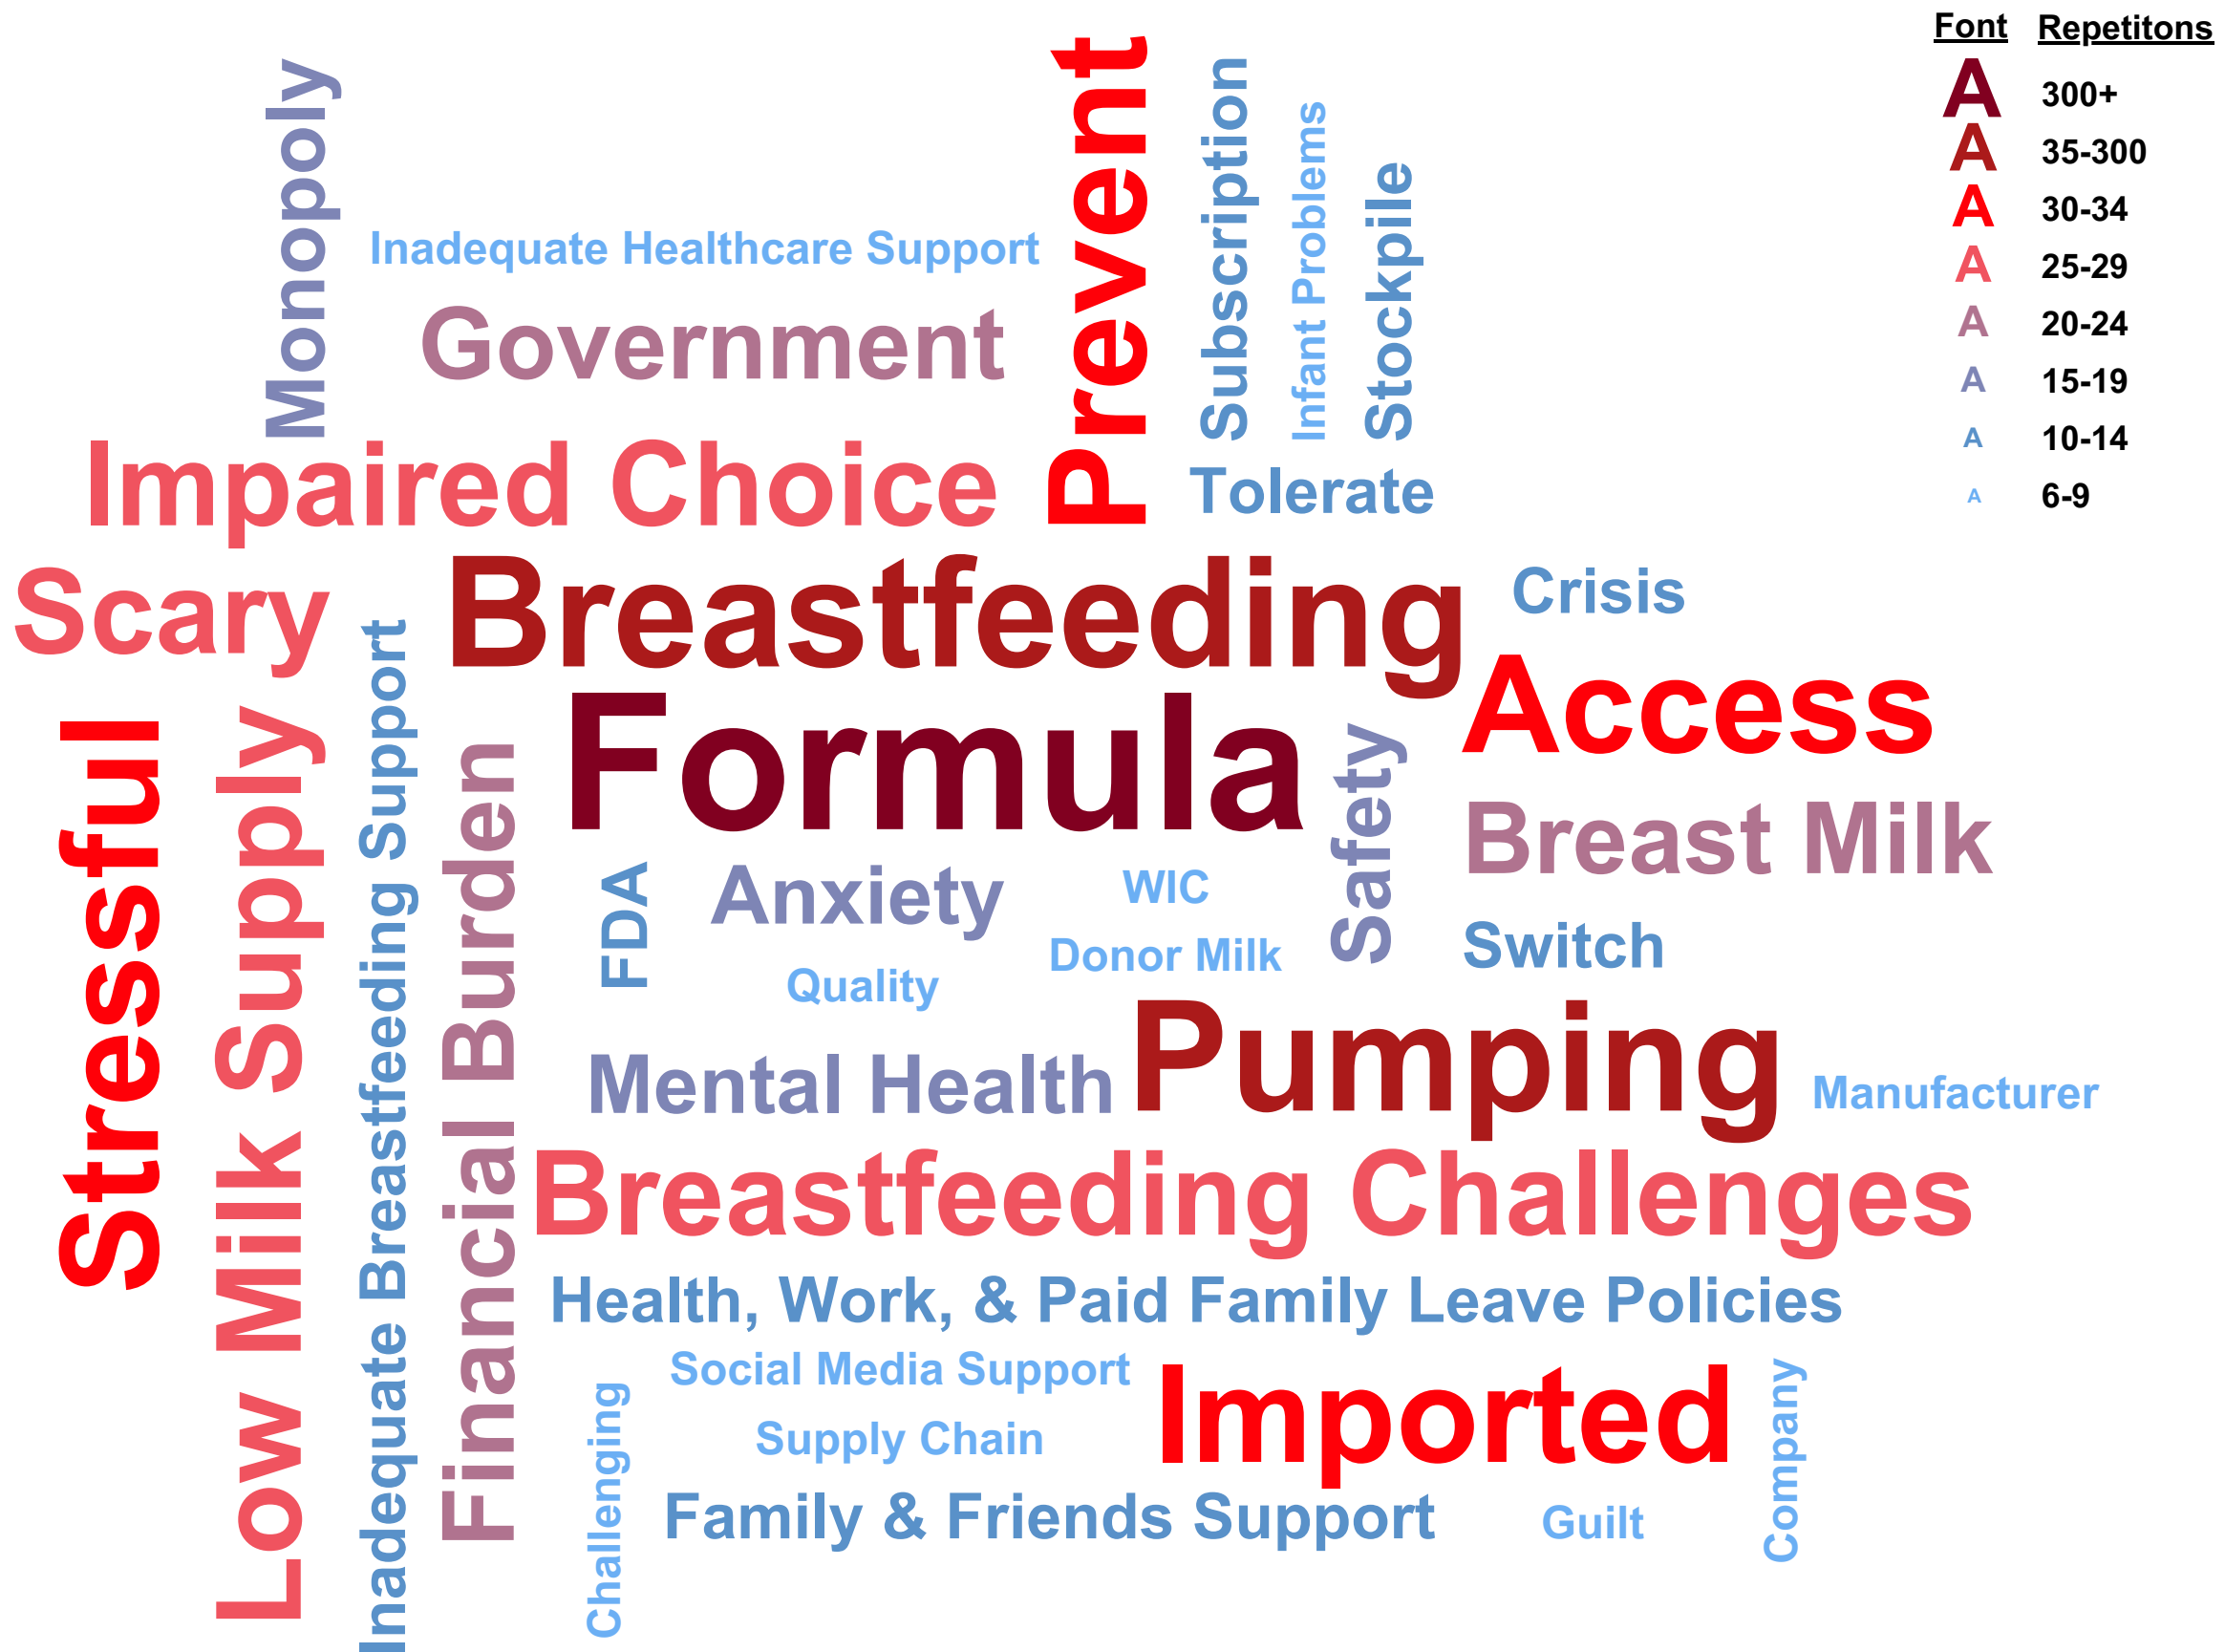

| Font | Repetitions |
|------|-------------|
| A    | 300+        |
| A    | 35-300      |
| A    | 30-34       |
| A    | 25-29       |
| A    | 20-24       |
| A    | 15-19       |
| A    | 10-14       |
| A    | 6-9         |

Supplement: Supplementary file 2 [file supplementary]

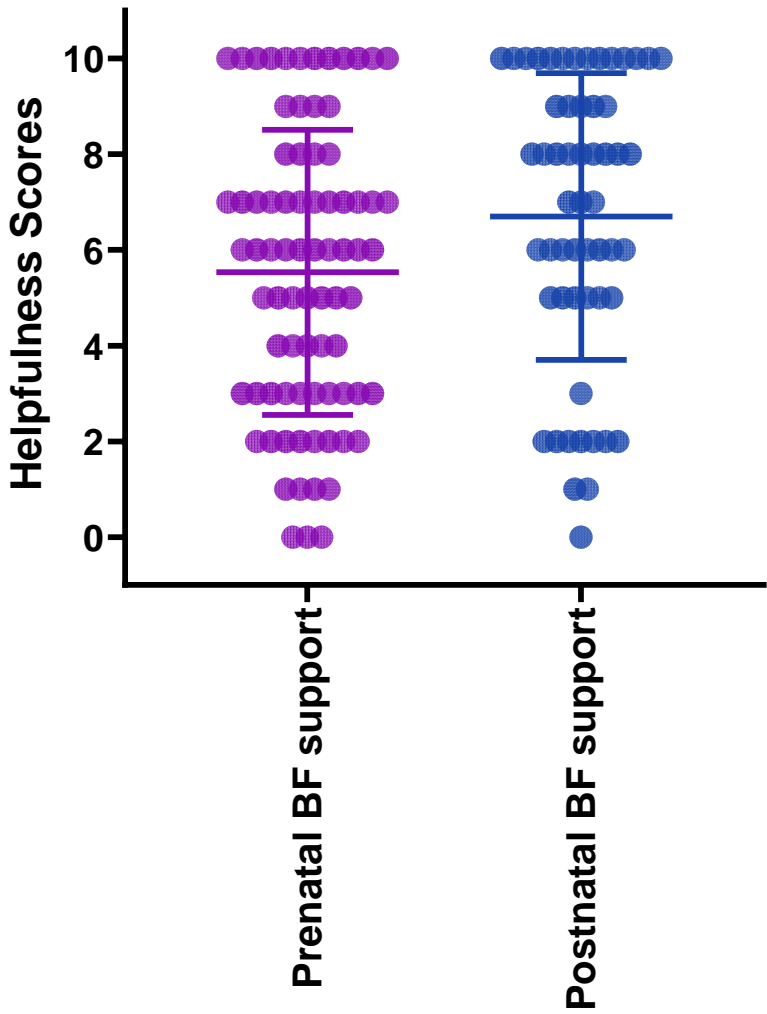

Supplement: Supplementary file 4 [file supplementary]

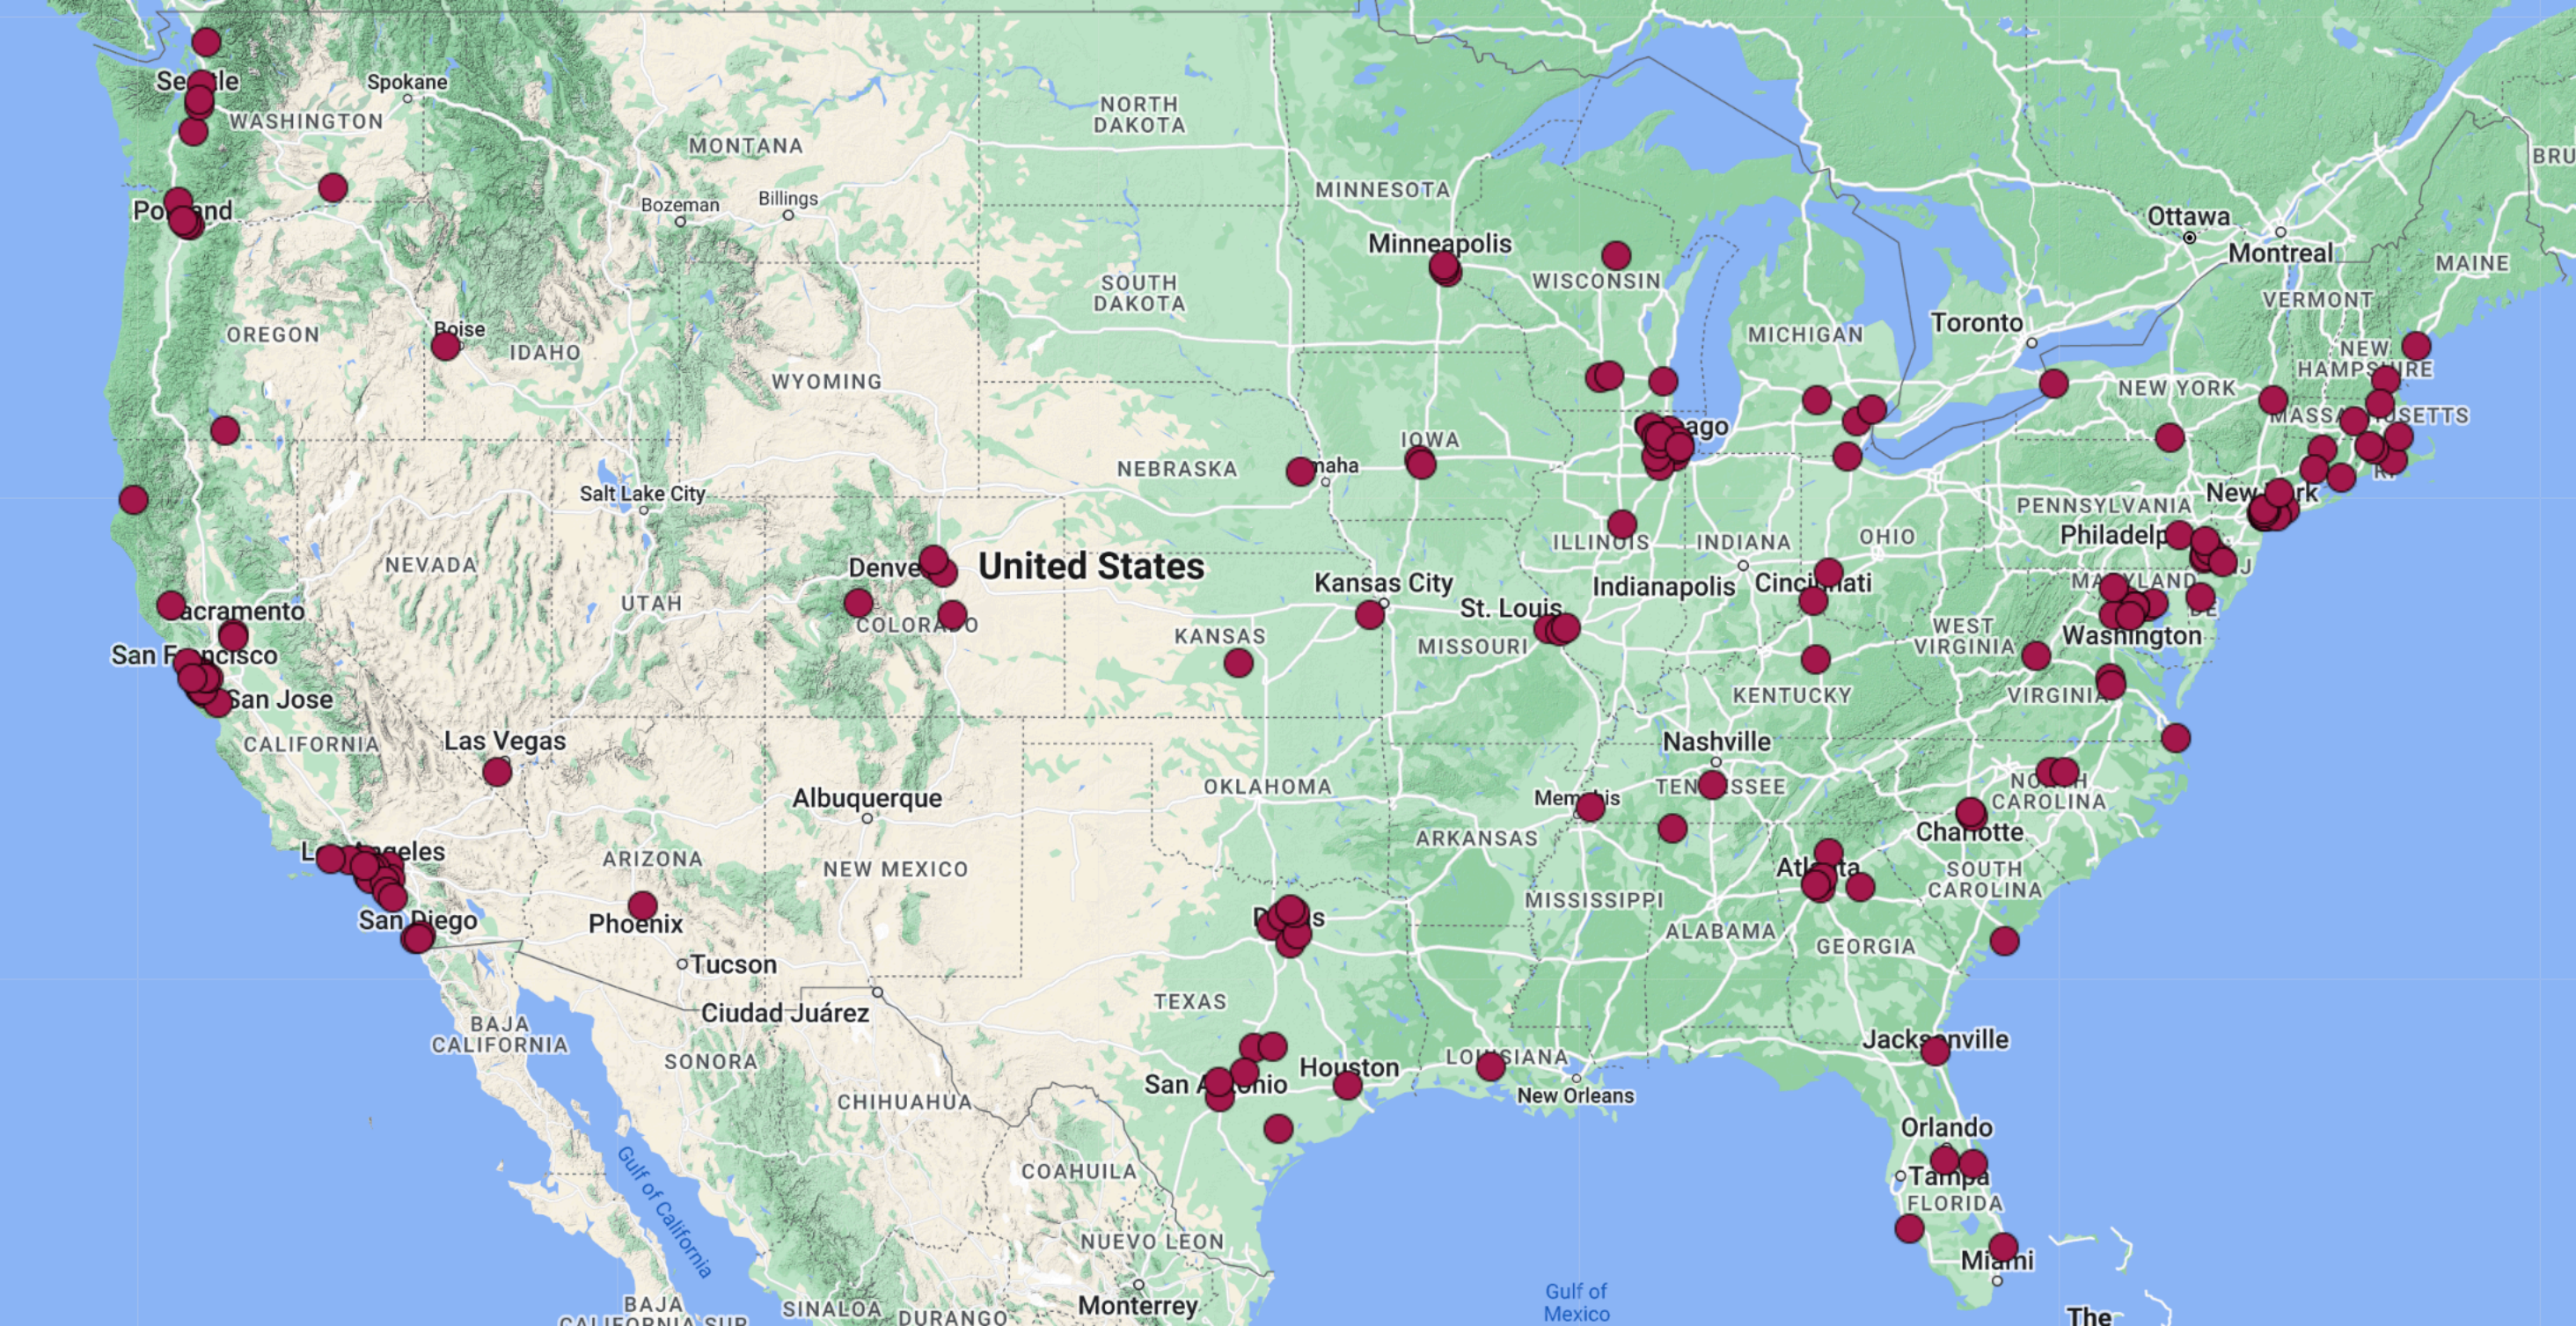

Supplement: Supplementary file 5 [file supplementary]

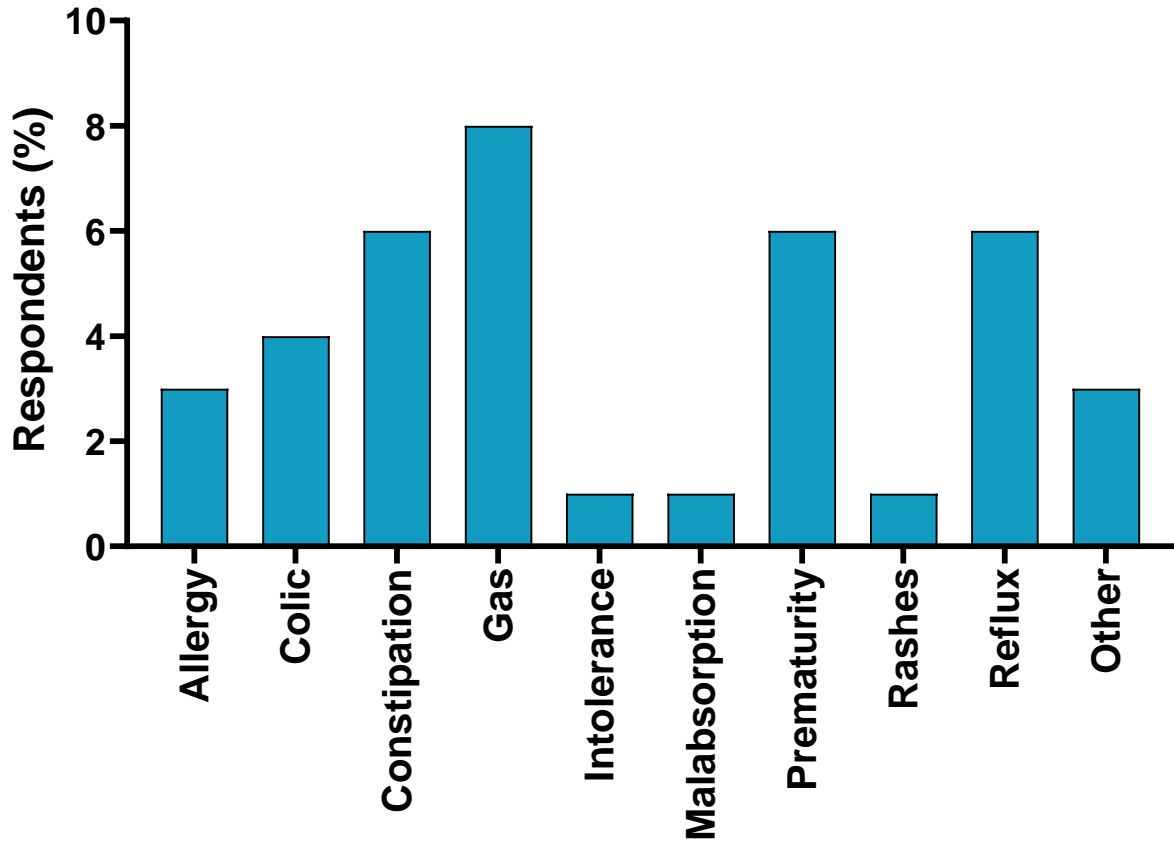

Supplement: Supplementary file 6 [file supplementary]

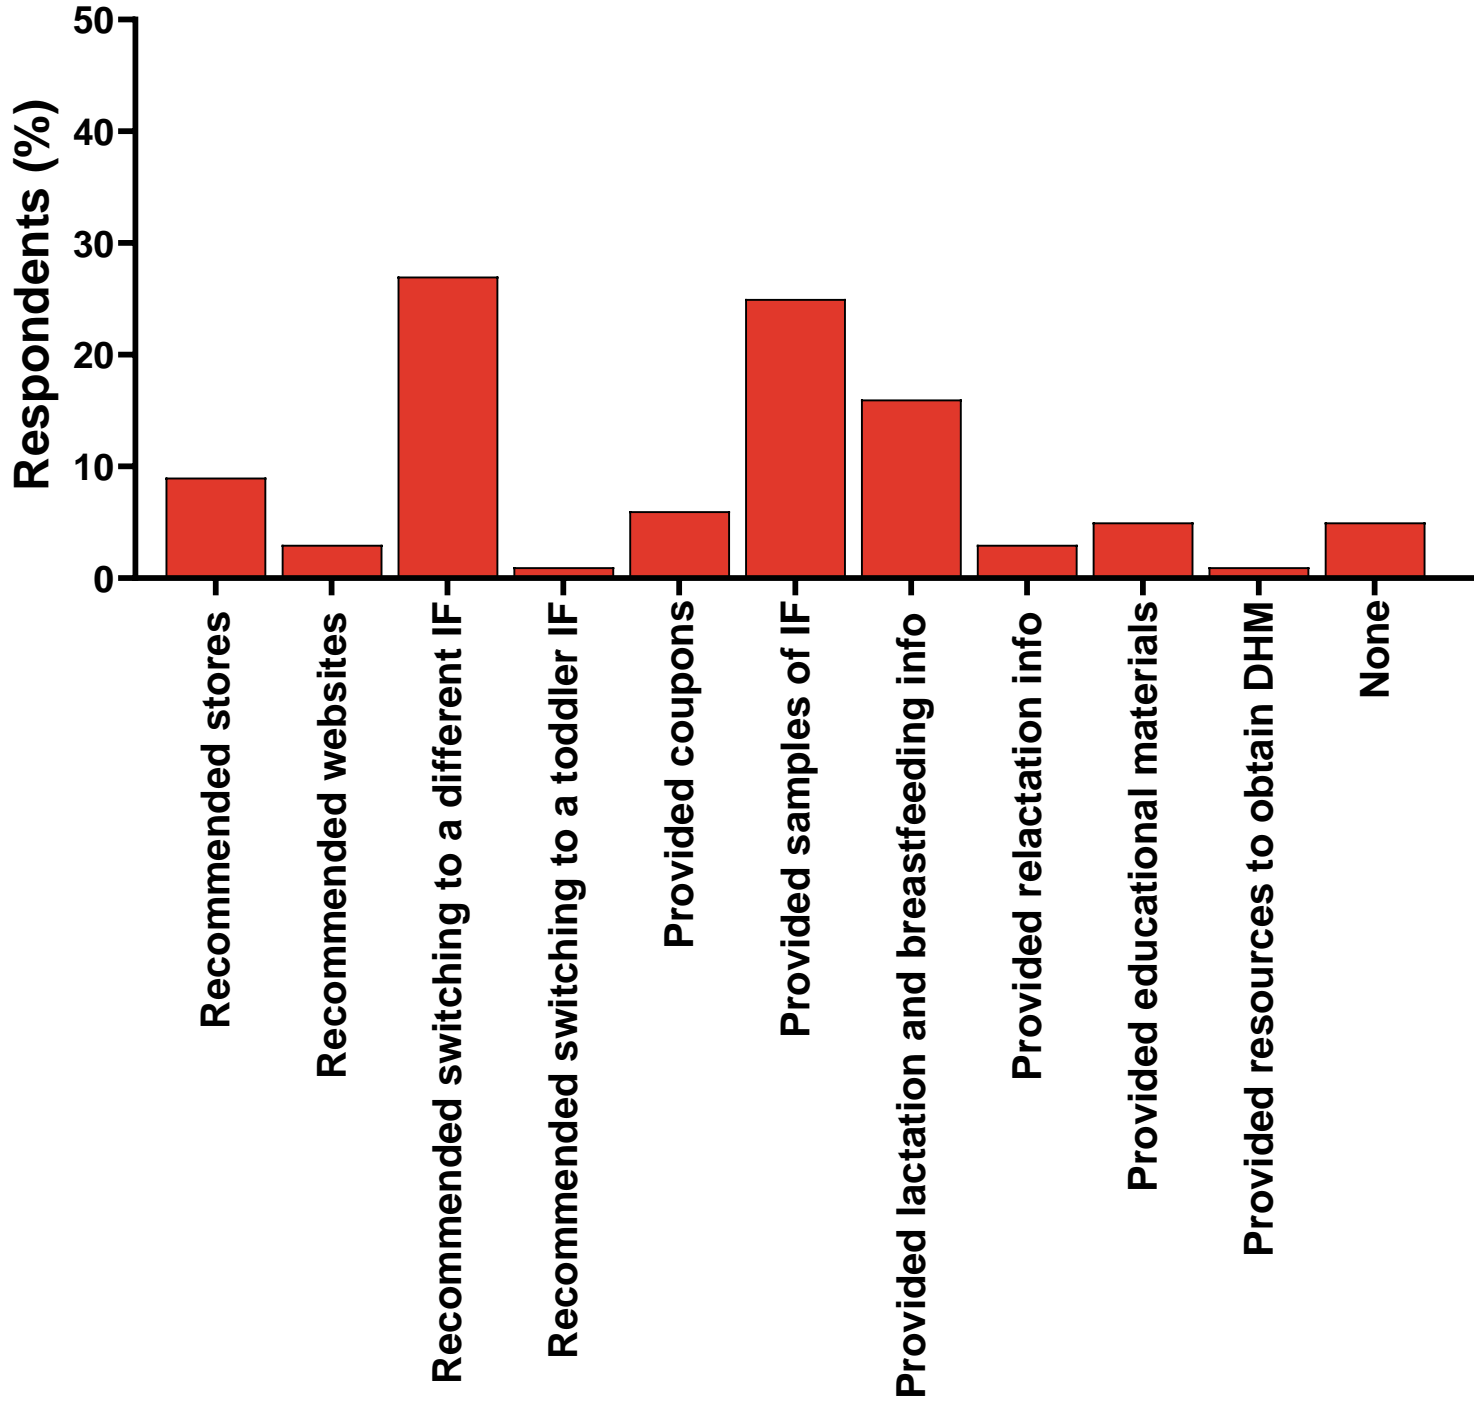

Supplement: Supplementary file 7 [file supplementary]

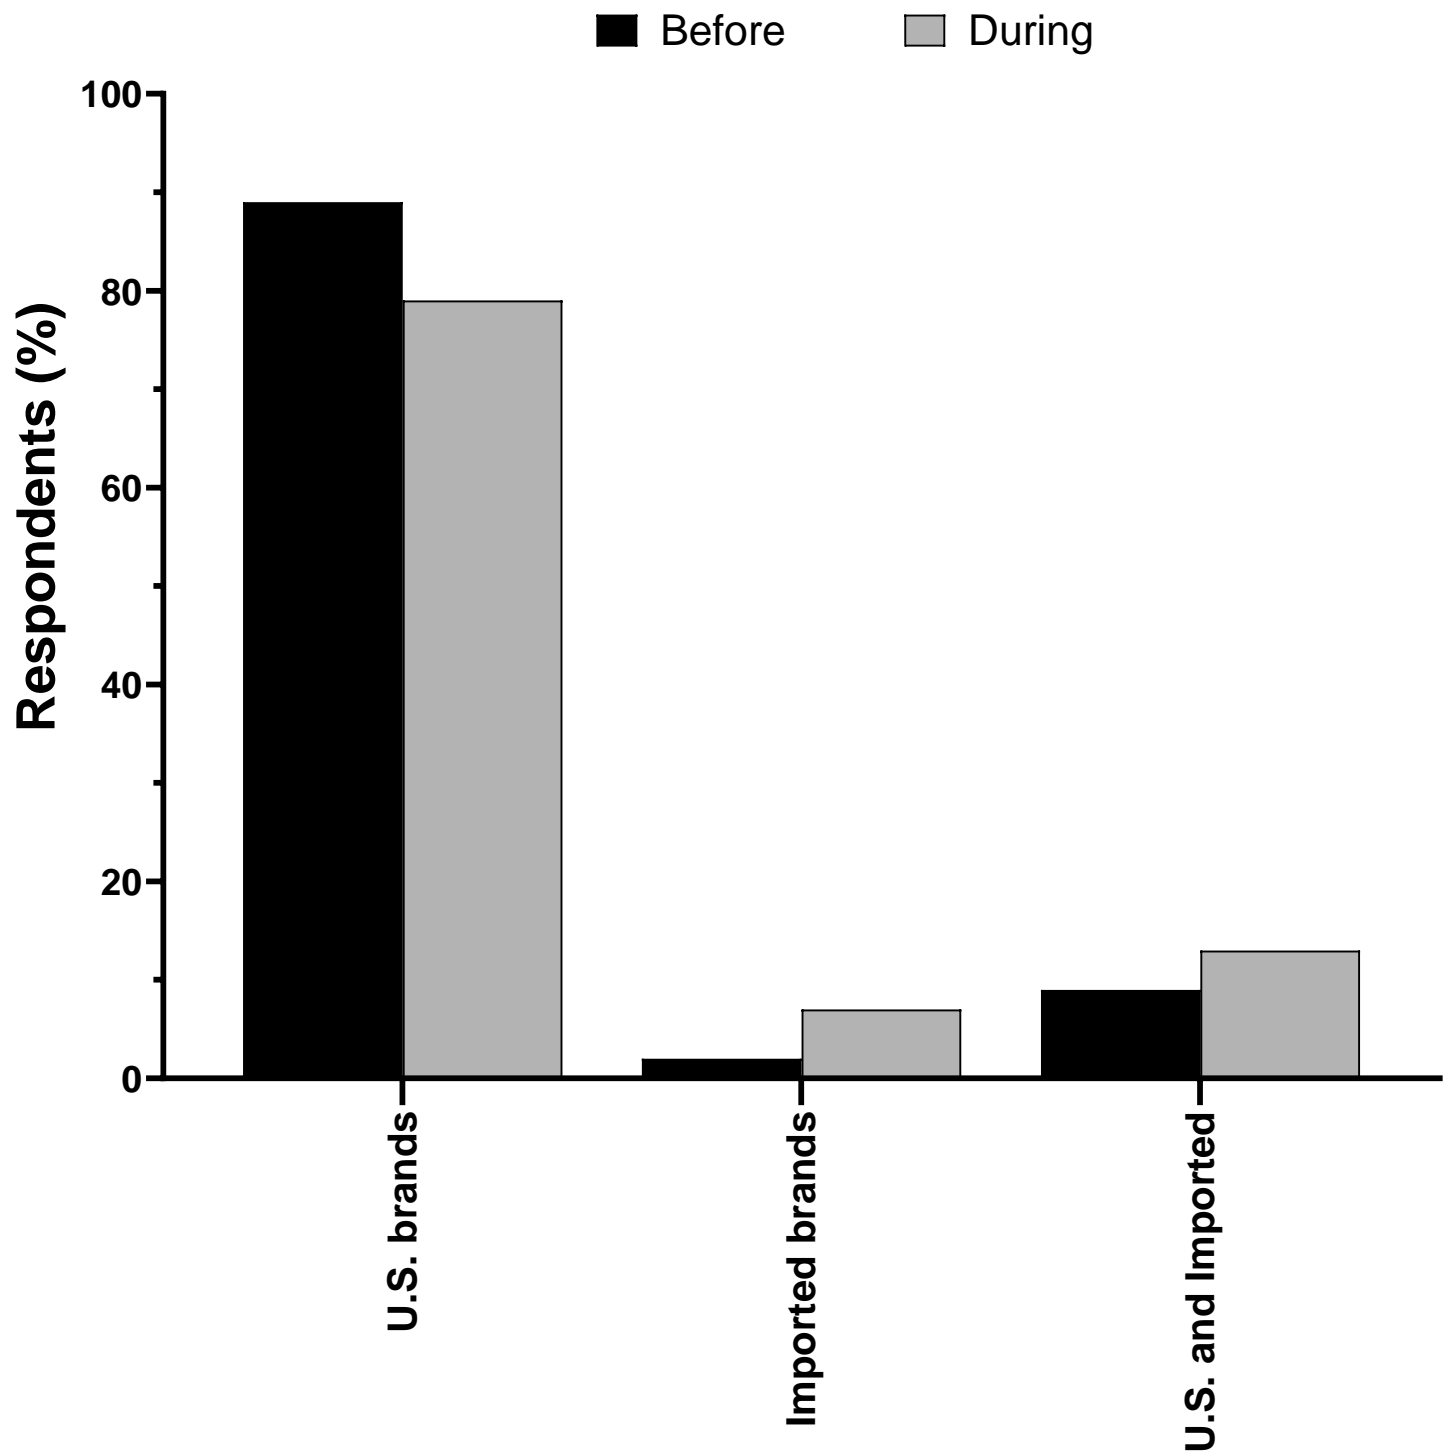

Supplement: Supplementary file 9 [file supplementary]

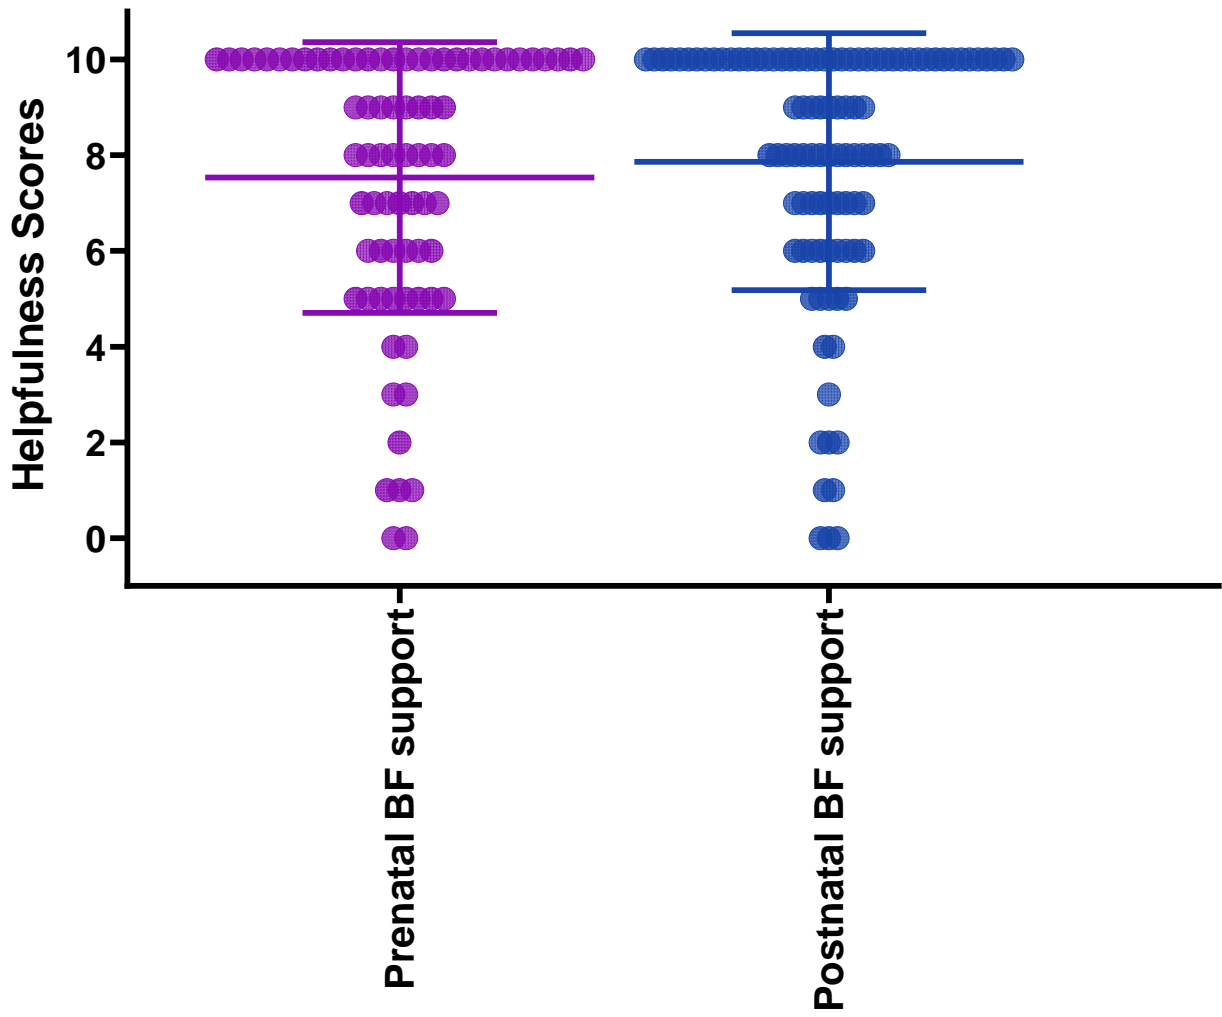

Supplement: Supplementary file 11 [file supplementary]
